# Supplementary material for: Transcriptome and genome sequencing elucidates the molecular basis for the high yield and good quality of the hybrid rice variety Chuanyou6203
Source: PubMed Central journal article supplement (PMC7673993; doi:10.1038/s41598-020-76762-3), 2020-11-17
Supplement: 41598_2020_76762_MOESM4_ESM.pdf [file 41598_2020_76762_MOESM4_ESM.pdf]

# **Transcriptome and genome sequencing elucidates the molecular basis for the high yield and good quality of the hybrid rice variety Chuanyou6203**

Juansheng Ren<sup>1\*</sup>, Fan Zhang<sup>2\*</sup>, Fangyuan Gao<sup>1</sup>, Lihua Zeng<sup>3</sup>, Xianjun Lu<sup>1</sup>, Xiuqin Zhao<sup>2</sup>, Jianqun Lv<sup>1</sup>, Xiangwen Su<sup>1</sup>, Liping Liu<sup>1</sup>, Mingli Dai<sup>1</sup>, Jianlong Xu<sup>2</sup>, Guangjun Ren<sup>1\*\*</sup>

<sup>1</sup>Crop Research Institute, Sichuan Academy of Agricultural Sciences, Chengdu, 610066, P.R. China

<sup>2</sup>Institute of Crop Sciences, Chinese Academy of Agricultural Sciences, Beijing, 100081, P.R. China

<sup>3</sup>Sichuan Normal University, Chengdu, 610066, P.R. China

\*These authors contributed equally to the work

\*\*Corresponding author email: [guangjun61@sina.com](mailto:guangjun61@sina.com).

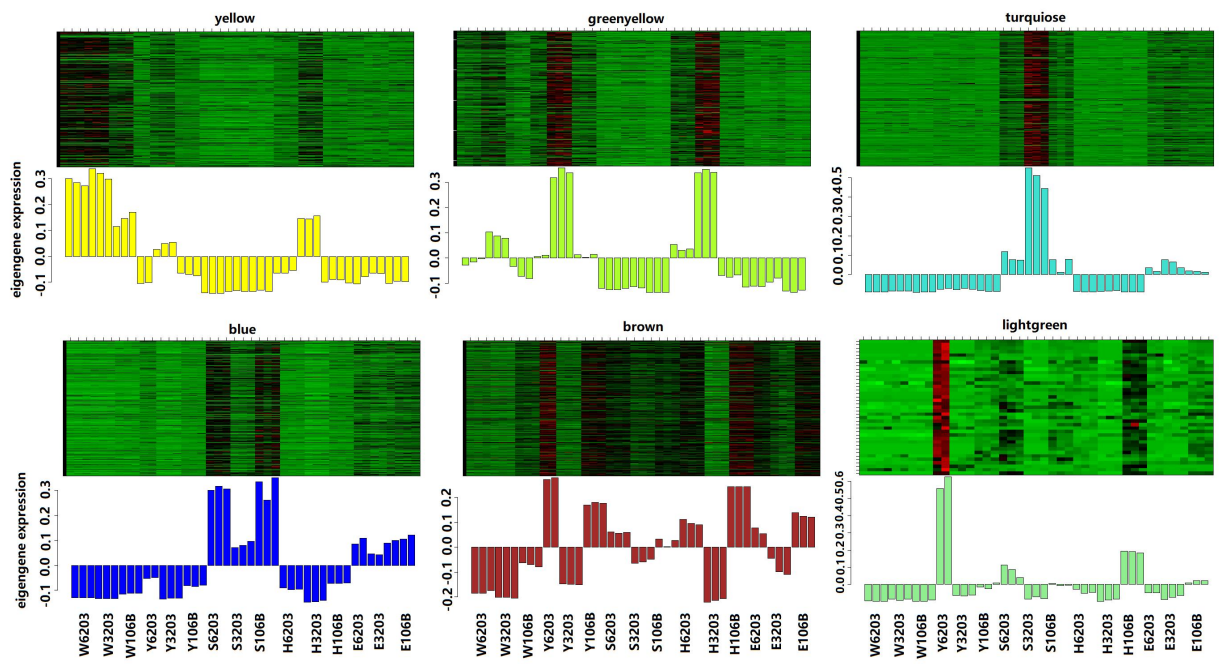

Figure S4 Partial module eigengene values and heatmap among 43 samples.
