# Supplementary material for: Transcriptome and genome sequencing elucidates the molecular basis for the high yield and good quality of the hybrid rice variety Chuanyou6203
Source: PubMed Central journal article supplement (PMC7673993; doi:10.1038/s41598-020-76762-3), 2020-11-17
Supplement: 41598_2020_76762_MOESM10_ESM.pdf [file 41598_2020_76762_MOESM10_ESM.pdf]

# Transcriptome and genome sequencing elucidates the molecular basis for the high yield and good quality of the hybrid rice variety Chuanyou6203

Juansheng Ren\*<sup>1</sup>, Fan Zhang\*<sup>2</sup>, Fangyuan Gao<sup>1</sup>, Lihua Zeng<sup>3</sup>, Xianjun Lu<sup>1</sup>, Xiuqin Zhao<sup>2</sup>, Jianqun Lv<sup>1</sup>, Xiangwen Su<sup>1</sup>, Liping Liu<sup>1</sup>, Mingli Dai<sup>1</sup>, Jianlong Xu<sup>2</sup>, Guangjun Ren<sup>1\*\*</sup>

<sup>1</sup>Crop Research Institute, Sichuan Academy of Agricultural Sciences, Chengdu, 610066, P.R. China

<sup>2</sup>Institute of Crop Sciences, Chinese Academy of Agricultural Sciences, Beijing, 100081, P.R. China

<sup>3</sup>Sichuan Normal University, Chengdu, 610066, P.R. China

\*These authors contributed equally to the work

\*\*Corresponding author email: guangjun61@sina.com.

Table S1 Summary of resequencing data and mapping statistics on the reference genome

| Sample | Clean base  | Clean Num. | reads | Average depth | Q30(%) | GC(%) | Mapped(%) | Properly_mapped(%) |
|--------|-------------|------------|-------|---------------|--------|-------|-----------|--------------------|
| C106B  | 5636763721  | 64538006   |       | 22            | 89.46  | 40.73 | 92.63     | 91.3               |
| CH3203 | 26228509240 | 175093610  |       | 61            | 85.44  | 43.29 | 94.98     | 85.56              |
