# Supplementary material for: Transcriptome and genome sequencing elucidates the molecular basis for the high yield and good quality of the hybrid rice variety Chuanyou6203
Source: PubMed Central journal article supplement (PMC7673993; doi:10.1038/s41598-020-76762-3), 2020-11-17
Supplement: 41598_2020_76762_MOESM12_ESM.pdf [file 41598_2020_76762_MOESM12_ESM.pdf]

# Transcriptome and genome sequencing elucidates the molecular basis for the high yield and good quality of the hybrid rice variety Chuanyou6203

Juansheng Ren\*<sup>1</sup>, Fan Zhang\*<sup>2</sup>, Fangyuan Gao<sup>1</sup>, Lihua Zeng<sup>3</sup>, Xianjun Lu<sup>1</sup>, Xiuqin Zhao<sup>2</sup>, Jianqun Lv<sup>1</sup>, Xiangwen Su<sup>1</sup>, Liping Liu<sup>1</sup>, Mingli Dai<sup>1</sup>, Jianlong Xu<sup>2</sup>, Guangjun Ren<sup>1\*\*</sup>

<sup>1</sup>Crop Research Institute, Sichuan Academy of Agricultural Sciences, Chengdu, 610066, P.R. China

<sup>2</sup>Institute of Crop Sciences, Chinese Academy of Agricultural Sciences, Beijing, 100081, P.R. China

<sup>3</sup>Sichuan Normal University, Chengdu, 610066, P.R. China

\*These authors contributed equally to the work

\*\*Corresponding author email: [guangjun61@sina.com](mailto:guangjun61@sina.com).

Table 3 Summary of RNA-seq data and mapping statistics on the reference genome

| Sample  | HQ Clean Data (bp) | HQ Clean Reads | Q30 % | GC %  | Reads Num. after filtered rRNA | Mapping Ratio % | Known Gene Num. |
|---------|--------------------|----------------|-------|-------|--------------------------------|-----------------|-----------------|
| W6203-1 | 11300506106        | 76169578       | 94.24 | 54.61 | 72665108                       | 84.18           | 25242           |
| W6203-2 | 8148068869         | 55160382       | 89.49 | 54.22 | 53297408                       | 78.40           | 24332           |
| W6203-3 | 8696052450         | 59056872       | 88.80 | 54.23 | 56556802                       | 77.95           | 24381           |
| W3203-1 | 10053674119        | 67735144       | 94.02 | 55.13 | 66424844                       | 85.62           | 24914           |
| W3203-2 | 12056776812        | 81251036       | 93.79 | 55.37 | 77712124                       | 85.50           | 24998           |
| W3203-3 | 10802879693        | 72757552       | 94.13 | 55.34 | 69307686                       | 86.56           | 24860           |
| W106B-1 | 8981285607         | 60551516       | 93.42 | 54.86 | 58516764                       | 85.80           | 24432           |
| W106B-2 | 9178862093         | 61853502       | 93.56 | 54.30 | 59283840                       | 85.60           | 24998           |
| W106B-3 | 10191169486        | 68587864       | 94.28 | 55.28 | 66087670                       | 86.30           | 24856           |
| Y6203-1 | 11823055437        | 79781008       | 93.63 | 54.08 | 58017758                       | 83.11           | 24306           |
| Y6203-2 | 7671360039         | 51701644       | 93.44 | 54.50 | 49284946                       | 84.42           | 25367           |
| Y6203-3 | 10012576488        | 67501494       | 93.68 | 54.64 | 63490854                       | 84.69           | 26083           |
| Y3203-1 | 12092508354        | 81491078       | 93.97 | 55.91 | 75947322                       | 85.77           | 24714           |
| Y3203-2 | 8408234170         | 56695606       | 93.76 | 55.75 | 53715170                       | 86.32           | 24632           |
| Y3203-3 | 12809600876        | 86341206       | 93.75 | 55.52 | 82817144                       | 86.61           | 25311           |

|         |               |             |       |       |             |       |          |
|---------|---------------|-------------|-------|-------|-------------|-------|----------|
| Y106B-1 | 11842407174   | 79770932    | 93.91 | 54.85 | 72457558    | 85.93 | 25471    |
| Y106B-2 | 11178089278   | 75285346    | 94.13 | 54.54 | 72157014    | 86.16 | 25152    |
| Y106B-3 | 9239609465    | 62259138    | 93.91 | 55.32 | 59810178    | 85.70 | 25016    |
| S6203-1 | 10730388792   | 72360936    | 94.01 | 55.04 | 70317550    | 86.46 | 29388    |
| S6203-2 | 9854289411    | 66464632    | 93.33 | 54.62 | 64489684    | 85.79 | 28987    |
| S6203-3 | 11157621901   | 75302106    | 93.28 | 54.50 | 73003714    | 85.92 | 29462    |
| S3203-1 | 8972285496    | 60796168    | 91.28 | 54.12 | 58865464    | 82.89 | 28069    |
| S3203-2 | 8262342135    | 56020796    | 90.58 | 54.71 | 54750640    | 81.95 | 28069    |
| S3203-3 | 9285781818    | 63078348    | 90.14 | 54.09 | 61742454    | 81.16 | 28145    |
| S106B-1 | 8869336543    | 60144702    | 90.73 | 54.48 | 58922058    | 81.73 | 28940    |
| S106B-2 | 10886785432   | 73975418    | 90.12 | 55.22 | 71669314    | 80.26 | 28429    |
| S106B-3 | 9447720271    | 63963906    | 91.14 | 54.93 | 61909592    | 82.37 | 28588    |
| H6203-1 | 8029426229    | 54619306    | 89.72 | 54.60 | 51226864    | 78.17 | 25300    |
| H6203-2 | 7569385291    | 51355174    | 90.09 | 54.34 | 49506816    | 79.12 | 24753    |
| H6203-3 | 13645344281   | 92035562    | 93.84 | 54.59 | 87451782    | 84.14 | 26178    |
| H3203-1 | 6505425062    | 43888162    | 91.83 | 56.65 | 42102810    | 84.02 | 23611    |
| H3203-2 | 8895684668    | 60425686    | 89.88 | 54.94 | 58176950    | 79.98 | 24391    |
| H3203-3 | 9518667597    | 64537372    | 90.45 | 54.77 | 62472786    | 80.86 | 24647    |
| H106B-1 | 9811338647    | 66372186    | 89.97 | 54.83 | 64280094    | 80.75 | 25072    |
| H106B-2 | 8279694311    | 56215400    | 90.13 | 54.51 | 53725478    | 79.14 | 24764    |
| H106B-3 | 9576682256    | 64979914    | 90.18 | 54.66 | 61375856    | 79.19 | 25265    |
| E6203-1 | 8683332115    | 58887944    | 90.56 | 54.10 | 56921326    | 79.35 | 27976    |
| E6203-2 | 8642034305    | 58747182    | 88.25 | 52.68 | 56772730    | 77.59 | 27843    |
| E6203-3 | 9093034449    | 61516102    | 91.25 | 54.41 | 59206698    | 81.40 | 28003    |
| E3203-1 | 9426382278    | 63953574    | 90.43 | 54.59 | 62360898    | 80.43 | 28036    |
| E3203-2 | 10154707165   | 68779518    | 91.08 | 55.23 | 66544724    | 81.54 | 27933    |
| E3203-3 | 14817194758   | 101156682   | 89.88 | 55.28 | 97558562    | 79.23 | 28608    |
| E106B-1 | 11487055944   | 78309042    | 89.66 | 54.22 | 75690020    | 78.39 | 28569    |
| E106B-2 | 12661640296   | 85381398    | 94.03 | 54.72 | 82166340    | 84.79 | 28797    |
| E106B-3 | 11395592924   | 76849592    | 93.88 | 55.51 | 74749264    | 84.79 | 28622    |
| Mean    | 10003242019.8 | 67645949.02 | 91.99 | 54.77 | 64566903.51 | 82.80 | 26344.67 |
|         | 0             |             |       |       |             |       |          |
| Max     | 14817194758   | 101156682   | 94.28 | 56.65 | 97558562.00 | 86.61 | 29462.00 |
| Min     | 6505425062.0  | 43888162.0  | 88.25 | 52.68 | 42102810.00 | 77.59 | 23611.00 |
